# Supplementary material for: Achieving higher hierarchical structures by cooperative assembly of tripeptides with reverse sequences
Source: Royal Society of Chemistry journal article supplement (doi:10.1039/d3nr00983a), 2023-01-01
Supplement: d3nr00983a1.pdf [file d3nr00983a1.pdf]

## Supporting Information

**Compound Nap-FVY:**  $^1\text{H NMR}$  (400 MHz, DMSO)  $\delta$  8.34 (d,  $J = 8.3$  Hz, 1H), 8.12 (t,  $J = 8.5$  Hz, 2H), 7.92 – 7.72 (m, 5H), 7.66 – 7.52 (m, 4H), 7.50 – 7.39 (m, 3H), 7.28 – 7.19 (m, 5H), 7.15 (d,  $J = 5.3$  Hz, 3H), 7.01 (d,  $J = 8.2$  Hz, 3H), 6.94 (d,  $J = 5.3$  Hz, 2H), 6.80 (d,  $J = 8.3$  Hz, 1H), 6.65 (d,  $J = 8.2$  Hz, 2H), 6.43 (d,  $J = 8.4$  Hz, 1H), 4.64 – 4.57 (m, 1H), 4.42 – 4.32 (m, 2H), 4.24 – 4.12 (m, 2H), 4.00 (t, 1H), 3.61 – 3.50 (m, 3H), 3.10 (s, 12H), 3.01 – 2.89 (m, 3H), 2.83 – 2.53 (m, 6H), 2.29 (s, 4H), 1.95 – 1.86 (m, 1H), 0.79 (d,  $J = 6.7$  Hz, 3H), 0.74 (d,  $J = 6.7$  Hz, 3H), 0.58 (d,  $J = 6.7$  Hz, 2H), 0.53 (d,  $J = 6.7$  Hz, 2H). The calculated  $m/z$  value = 595.27.

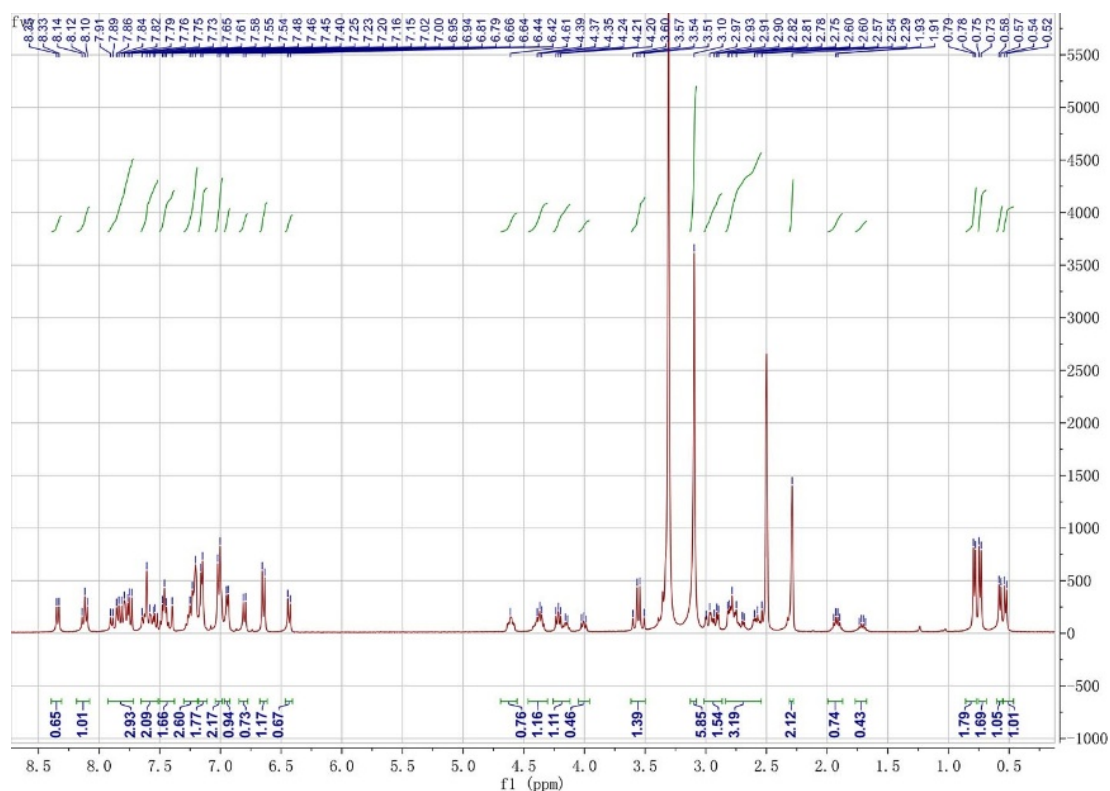

**Fig. S1**  $^1\text{H NMR}$  of Nap-FVY

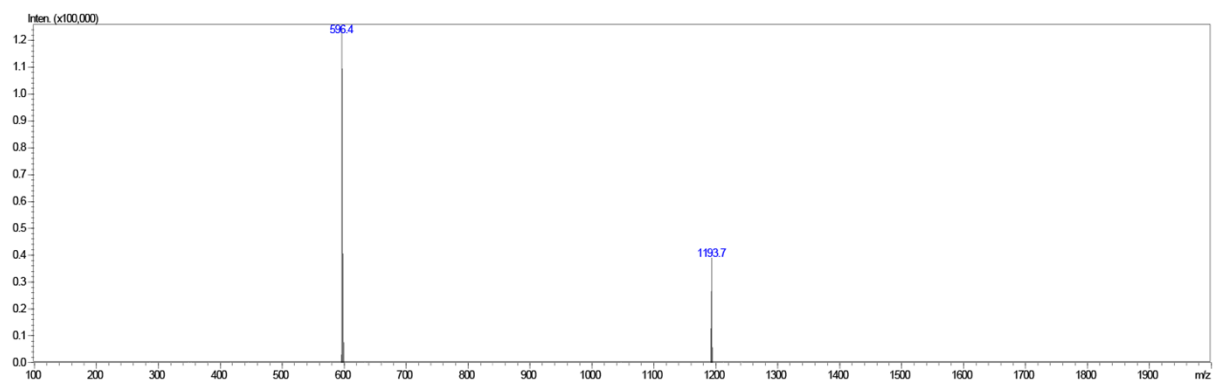

**Fig. S2** Mass Spectrum of Nap-FVY

**Compound Nap-YVF:**  $^1\text{H}$  NMR (300 MHz, DMSO)  $\delta$  8.32 (d,  $J = 8.4$  Hz, 1H), 8.22 (d,  $J = 7.7$  Hz, 1H), 7.87 – 7.76 (m, 4H), 7.73 (s, 1H), 7.59 (s, 1H), 7.49 – 7.42 (m, 2H), 7.28 – 7.16 (m, 6H), 7.01 (d,  $J = 8.4$  Hz, 2H), 6.60 (d,  $J = 8.4$  Hz, 2H), 4.55 – 4.40 (m, 2H), 4.23 – 4.16 (m, 1H), 3.55 (d,  $J = 7.7$  Hz, 2H), 3.10 – 3.01 (m, 1H), 2.95 – 2.88 (m, 1H), 2.87 – 2.80 (m, 1H), 2.69 – 2.58 (m, 2H), 1.95 – 1.84 (m, 1H), 0.77 (d,  $J = 6.7$  Hz, 3H), 0.72 (d,  $J = 6.7$  Hz, 3H). The calculated  $m/z$  value = 595.27.

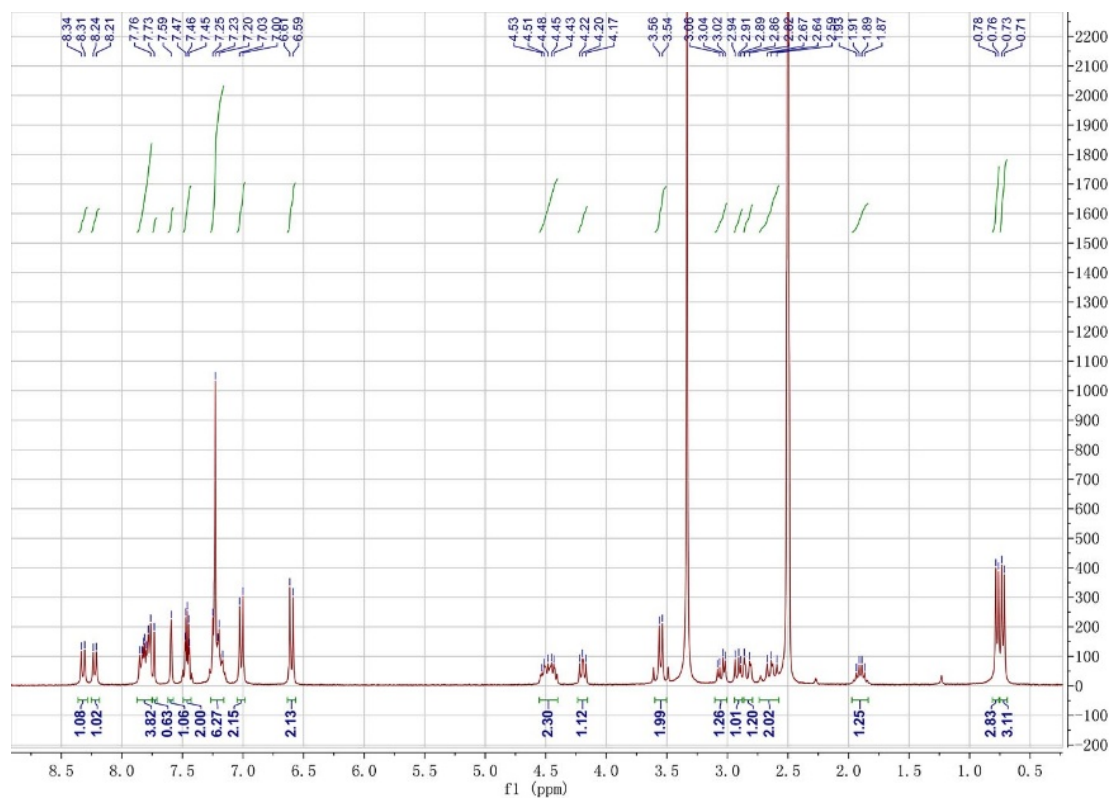

**Fig S3**  $^1\text{H}$  NMR of Nap-YVF

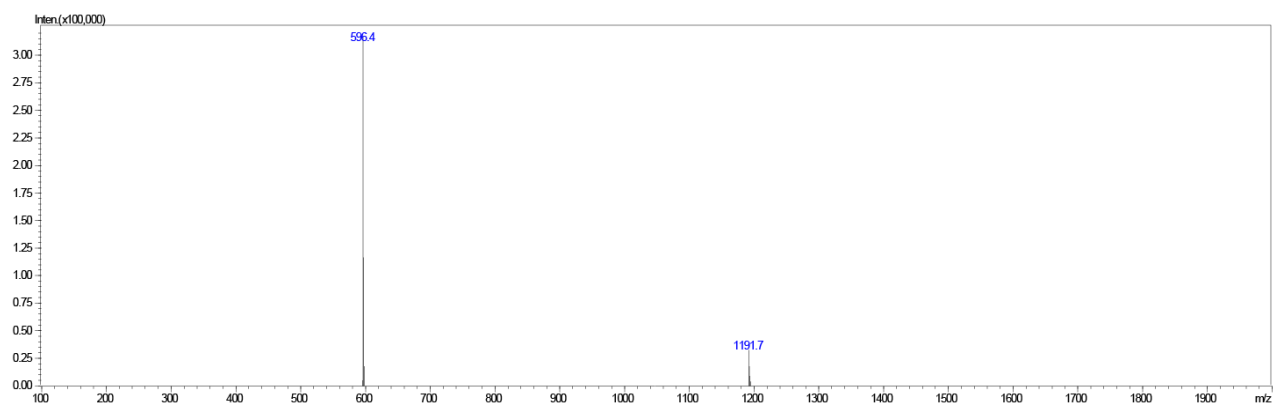

**Fig. S4** Mass Spectrum of Nap-YVF

**Compound Nap-VYF:**  $^1\text{H}$  NMR (400 MHz, DMSO)  $\delta$  8.10 (d,  $J = 7.7$  Hz, 1H), 8.00 (d,  $J = 9.0$  Hz, 1H), 7.91 (d,  $J = 8.4$  Hz, 1H), 7.88 – 7.81 (m, 1H), 7.75 (s, 1H), 7.48 – 7.40 (m, 1H), 7.28 – 7.18 (m, 1H), 6.98 (d,  $J = 8.1$  Hz, 1H), 6.61 (d,  $J = 8.1$  Hz, 1H), 4.49 – 4.42 (m, 1H), 4.17 – 4.12 (m, 1H), 3.74 (s, 1H), 3.71 (s, 1H), 3.60 (s, 1H), 3.57 (s, 1H), 3.08 – 3.00 (m, 1H), 2.95 – 2.82 (m, 1H), 2.68 – 2.60 (m, 1H), 1.94 – 1.86 (m, 1H), 0.71 (d,  $J = 6.6$  Hz, 1H). The calculated  $m/z$  value = 595.27.

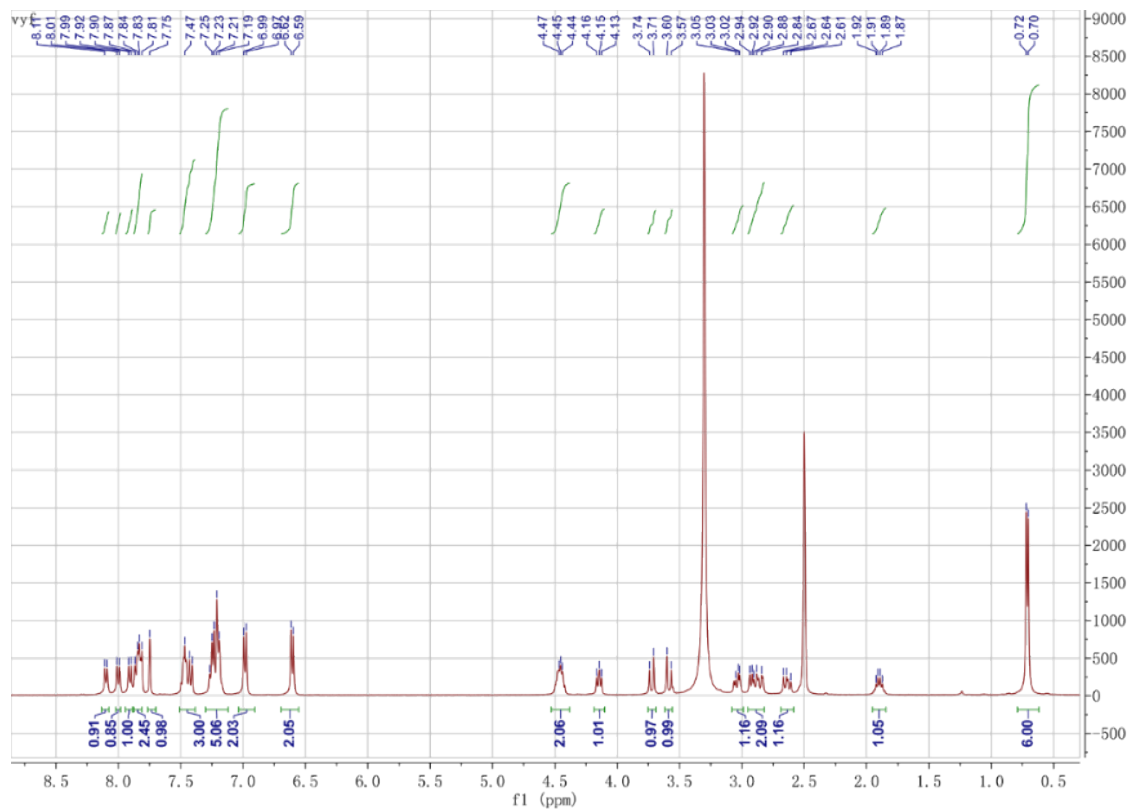

**Fig. S5**  $^1\text{H}$  NMR of Nap-VYF

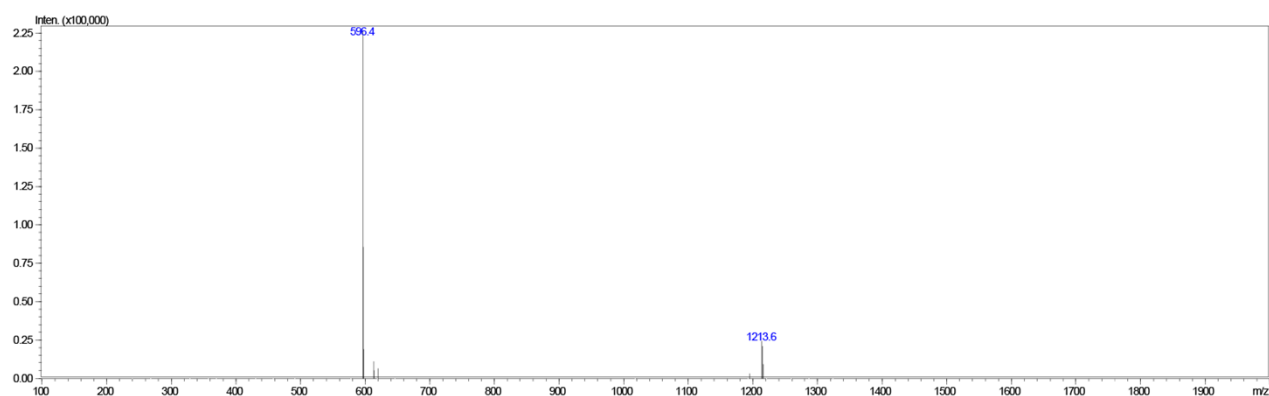

**Fig. S6.** Mass Spectrum of Nap-VYF

**Compound Nap-FYV:**  $^1\text{H}$  NMR (400 MHz, DMSO)  $\delta$  8.25 – 8.19 (m, 1H), 8.05 (d,  $J = 8.1$  Hz, 1H), 7.99 (d,  $J = 8.6$  Hz, 1H), 7.85 (d,  $J = 7.4$  Hz, 1H), 7.81 – 7.72 (m, 2H), 7.59 (s, 1H), 7.50 – 7.42 (m, 2H), 7.20 – 7.10 (m, 5H), 7.04 (d,  $J = 8.3$  Hz, 2H), 6.63 (d,  $J = 8.3$  Hz, 2H), 4.60 – 4.48 (m, 2H), 3.60 (s, 1H), 3.56 (s, 1H), 3.50 (s, 1H), 3.46 (s, 1H), 3.01 – 2.90 (m, 2H), 2.77 – 2.68 (m, 2H), 2.11 – 2.02 (m, 1H), 1.24 (s, 1H), 0.89 (d,  $J = 6.8$  Hz, 5H). The calculated  $m/z$  value = 595.27.

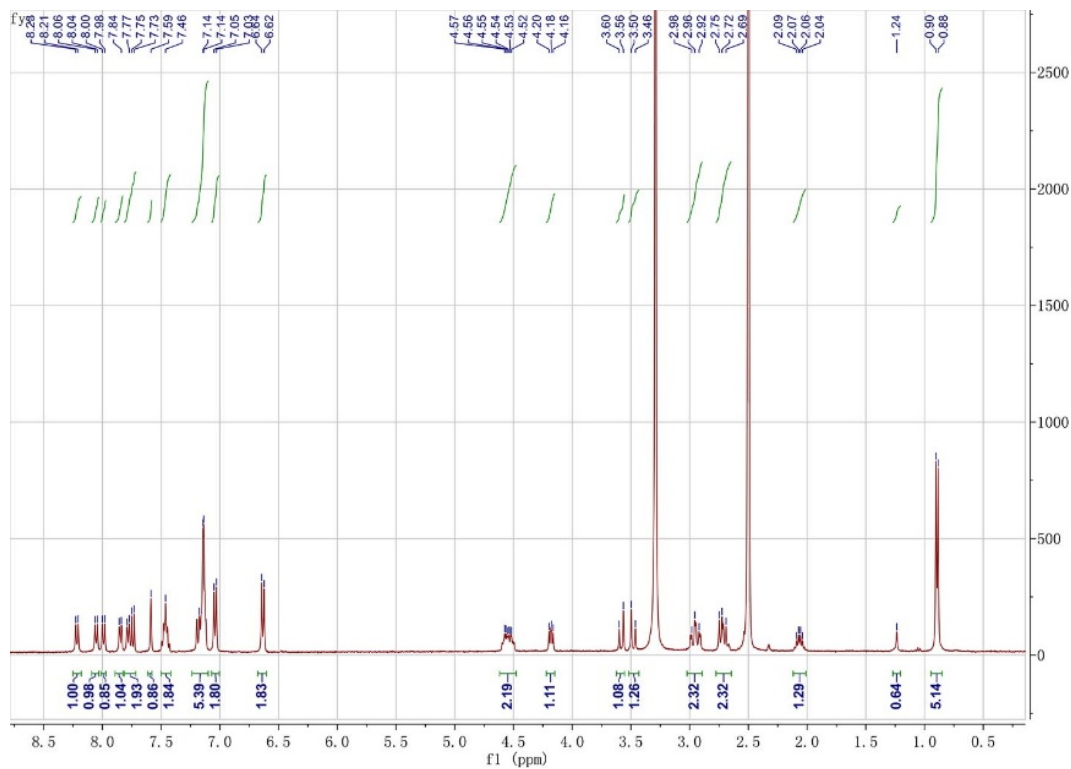

**Fig. S7**  $^1\text{H}$  NMR of Nap-FYV

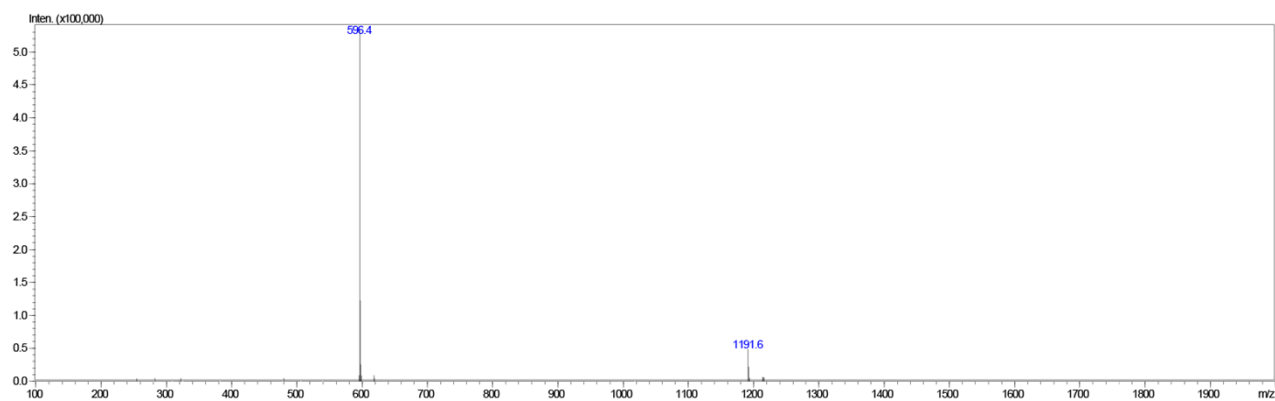

**Fig. S8** Mass Spectrum of Nap-FYV

**Compound Nap-VFY:**  $^1\text{H NMR}$  (400 MHz, DMSO)  $\delta$  8.09 (d,  $J = 7.6$  Hz, 1H), 8.05 (d,  $J = 8.8$  Hz, 1H), 7.87 (d,  $J = 7.5$  Hz, 1H), 7.82 (d,  $J = 8.1$  Hz, 1H), 7.74 (s, 1H), 7.47 (s, 1H), 7.42 (d,  $J = 8.3$  Hz, 1H), 7.20 – 7.14 (m, 1H), 7.13 – 7.08 (m, 1H), 6.99 (d,  $J = 7.8$  Hz, 1H), 6.64 (d,  $J = 7.6$  Hz, 1H), 4.56 (s, 1H), 4.40 – 4.34 (m, 1H), 4.15 (t,  $J = 7.6$  Hz, 1H), 3.72 (s, 1H), 3.69 (s, 1H), 3.60 (s, 1H), 3.57 (s, 1H), 3.01 – 2.88 (m, 1H), 2.85 – 2.70 (m, 1H), 1.90 (dd,  $J = 13.1, 5.8$  Hz, 1H), 0.71 (d,  $J = 6.5$  Hz, 1H). The calculated  $m/z$  value = 595.27.

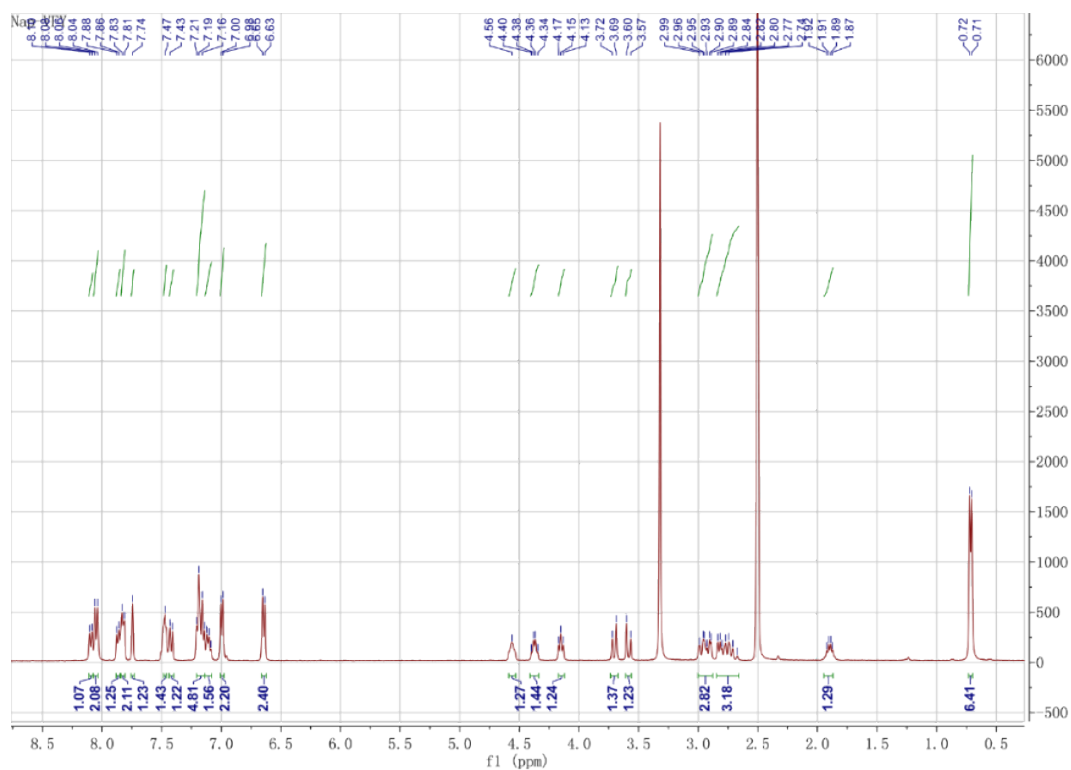

**Fig. S9**  $^1\text{H NMR}$  of Nap-VFY

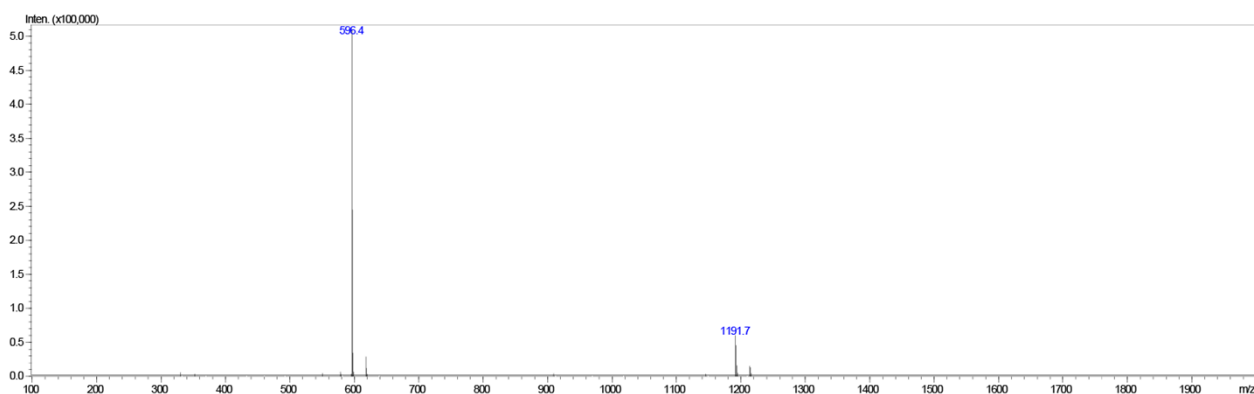

**Fig. S10** Mass Spectrum of Nap-VFY

**Compound Nap-YFV:**  $^1\text{H}$  NMR (400 MHz, DMSO)  $\delta$  8.16 – 8.07 (m, 1H), 8.02 (d,  $J = 8.3$  Hz, 1H), 7.84 (d,  $J = 8.7$  Hz, 1H), 7.81 – 7.73 (m, 1H), 7.59 (s, 1H), 7.49 – 7.43 (m, 1H), 7.27 – 7.18 (m, 2H), 7.16 (d,  $J = 6.8$  Hz, 1H), 6.95 (d,  $J = 8.3$  Hz, 1H), 6.56 (d,  $J = 8.3$  Hz, 1H), 4.68 – 4.62 (m, 1H), 4.47 – 4.41 (m, 1H), 4.20 – 4.16 (m, 1H), 3.59 (s, 1H), 3.56 (s, 1H), 3.50 (s, 1H), 3.47 (s, 1H), 3.08 – 3.00 (m, 1H), 2.87 – 2.78 (m, 1H), 2.67 – 2.57 (m, 1H), 2.07 (d,  $J = 6.3$  Hz, 1H), 0.90 (d,  $J = 6.8$  Hz, 3H). The calculated  $m/z$  value = 595.27.

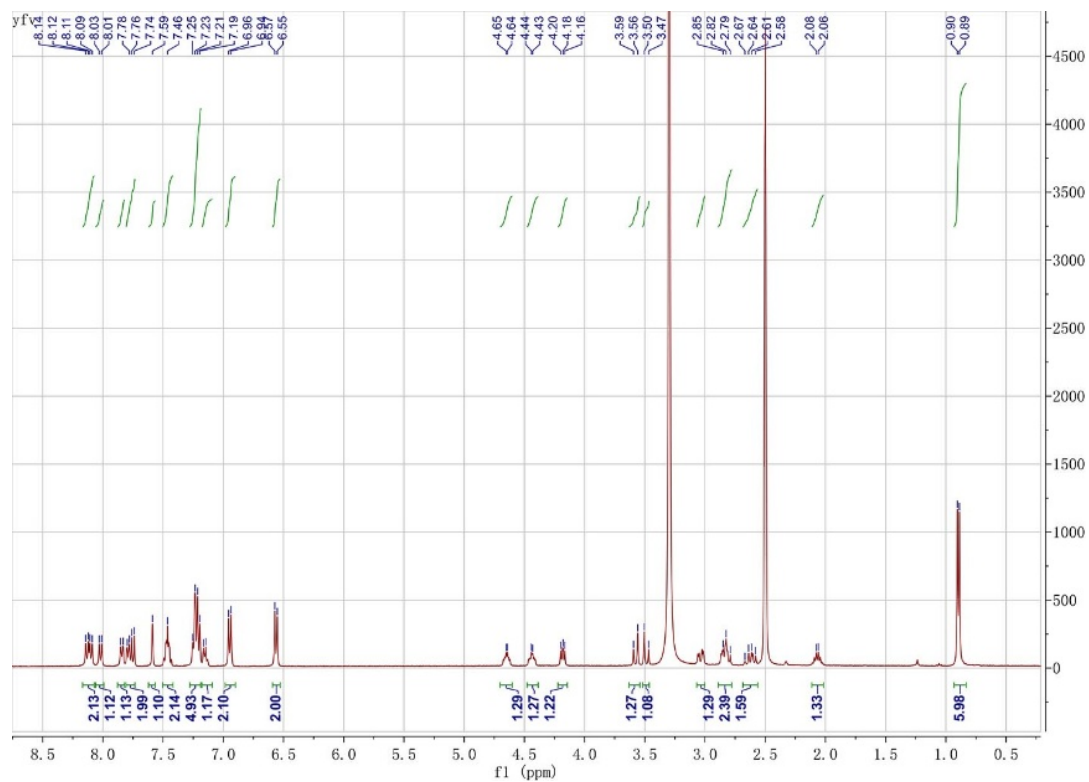

**Fig. S11**  $^1\text{H}$  NMR of Nap-YFV

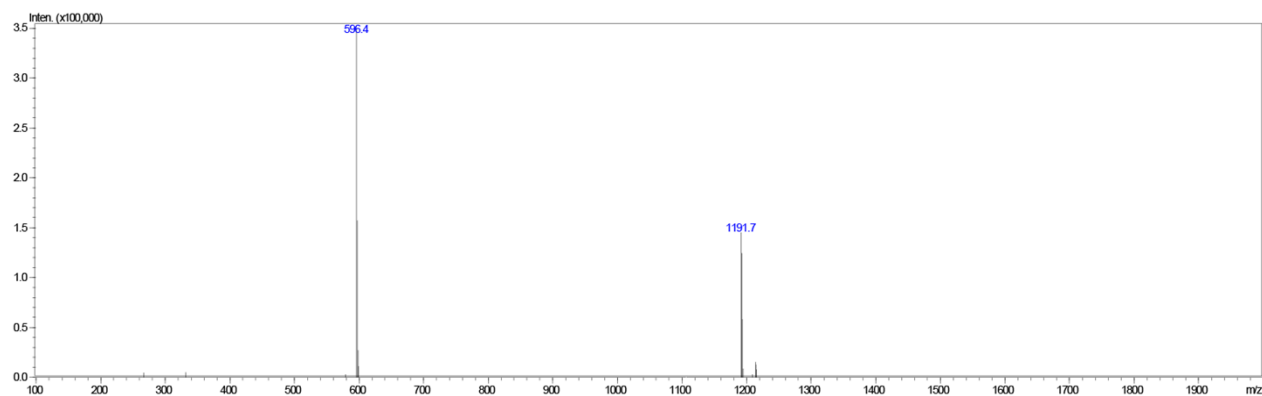

**Fig. S12** Mass Spectrum of Nap-YFV

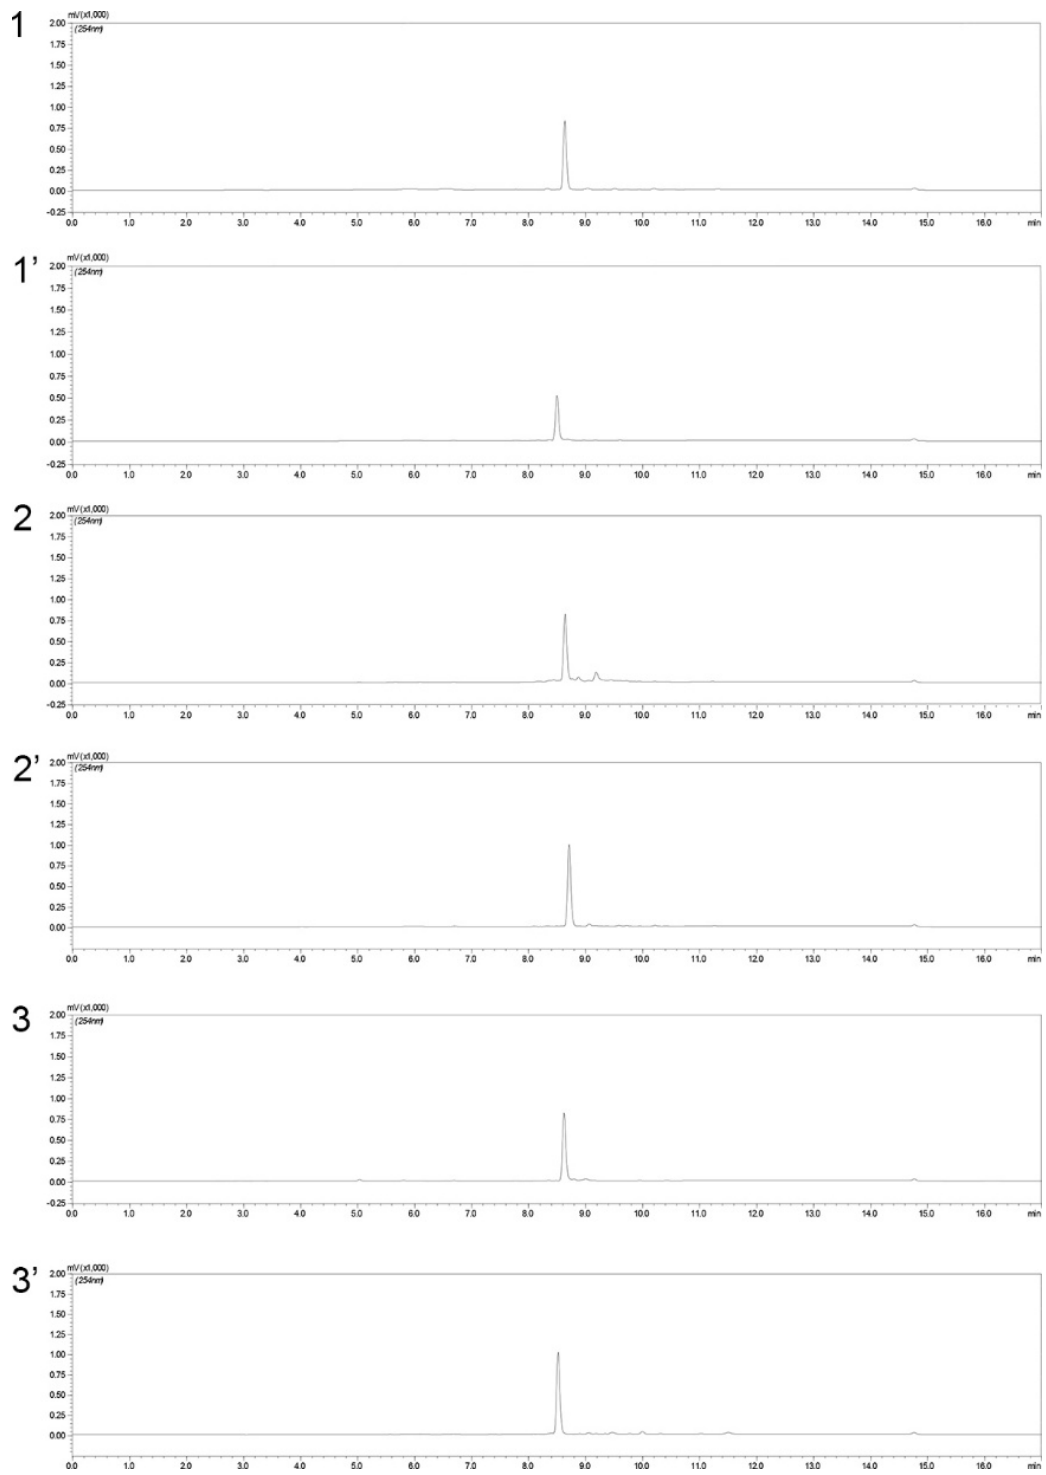

**Fig. S13** HPLC chromatograms and retention time of different peptides

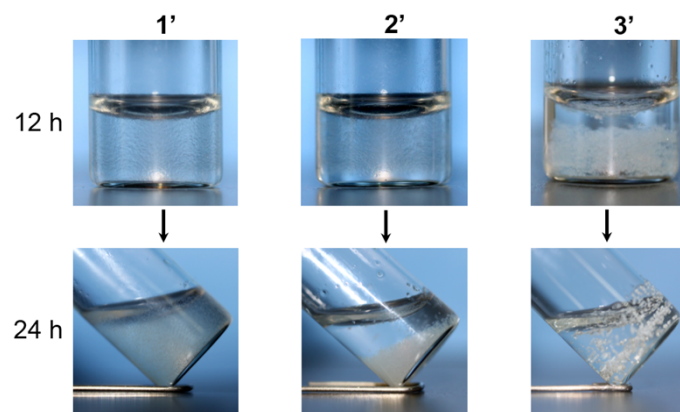

**Fig. S14** Optical images of progress of gel morphology at room temperature

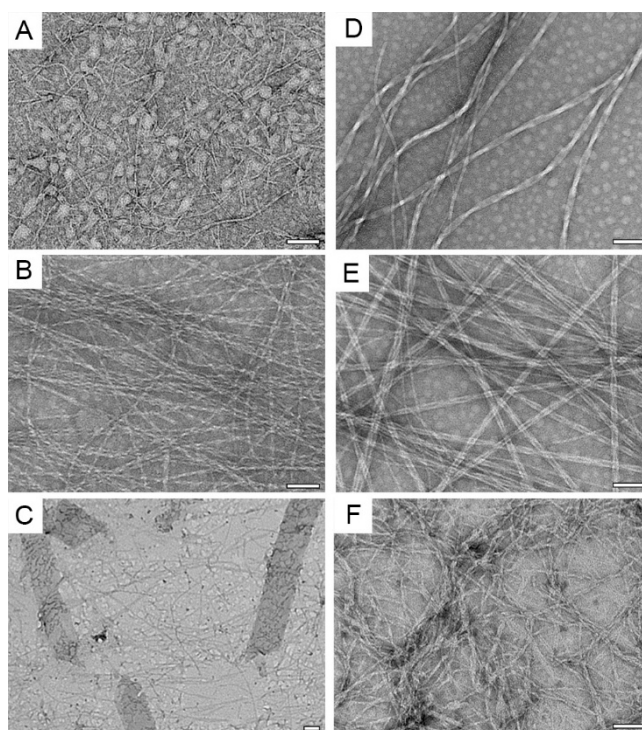

**Fig. S15** TEM images of (A-C) aggregation of  $1+1'$ ,  $2+2'$  and  $3+3'$  at the ratio of 1:5 and (D-F) aggregation of  $1+1'$ ,  $2+2'$  and  $3+3'$  at the ratio of 5:1. The scale bar is 100 nm.



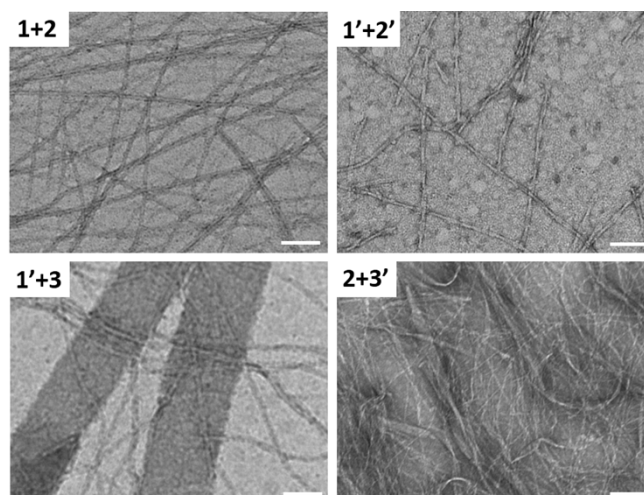

**Fig. S16** TEM images of collocation of non-reverse sequences. The scale bar is 100 nm.

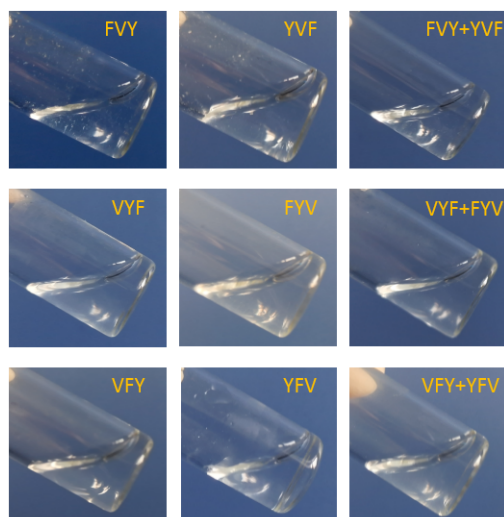

**Fig. S17** Optical images of solution of peptides without Nap-capping and solution of corresponding mixture.

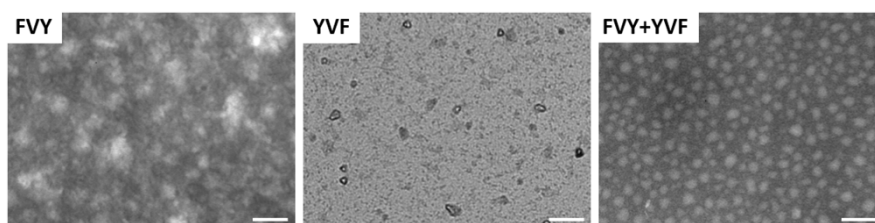

**Fig. S18** Optical images of solution of peptides without Nap-capping and solution of corresponding mixture. The scale bar is 100 nm.
